# Supplementary material for: Metabolomics in early life and the association with body composition at age 2 years
Source: PubMed Central journal article supplement (PMC9286420; doi:10.1111/ijpo.12859), 2021-10-13
Supplement: IJPO-17-0-s001.pdf [file IJPO-17-0-s001.pdf]

**Supplement Figure 1. Partial least squares – discriminant analysis modeling of the relationship between metabolite profile and high and low truncal:peripheral fat ratio in males and females separately.**

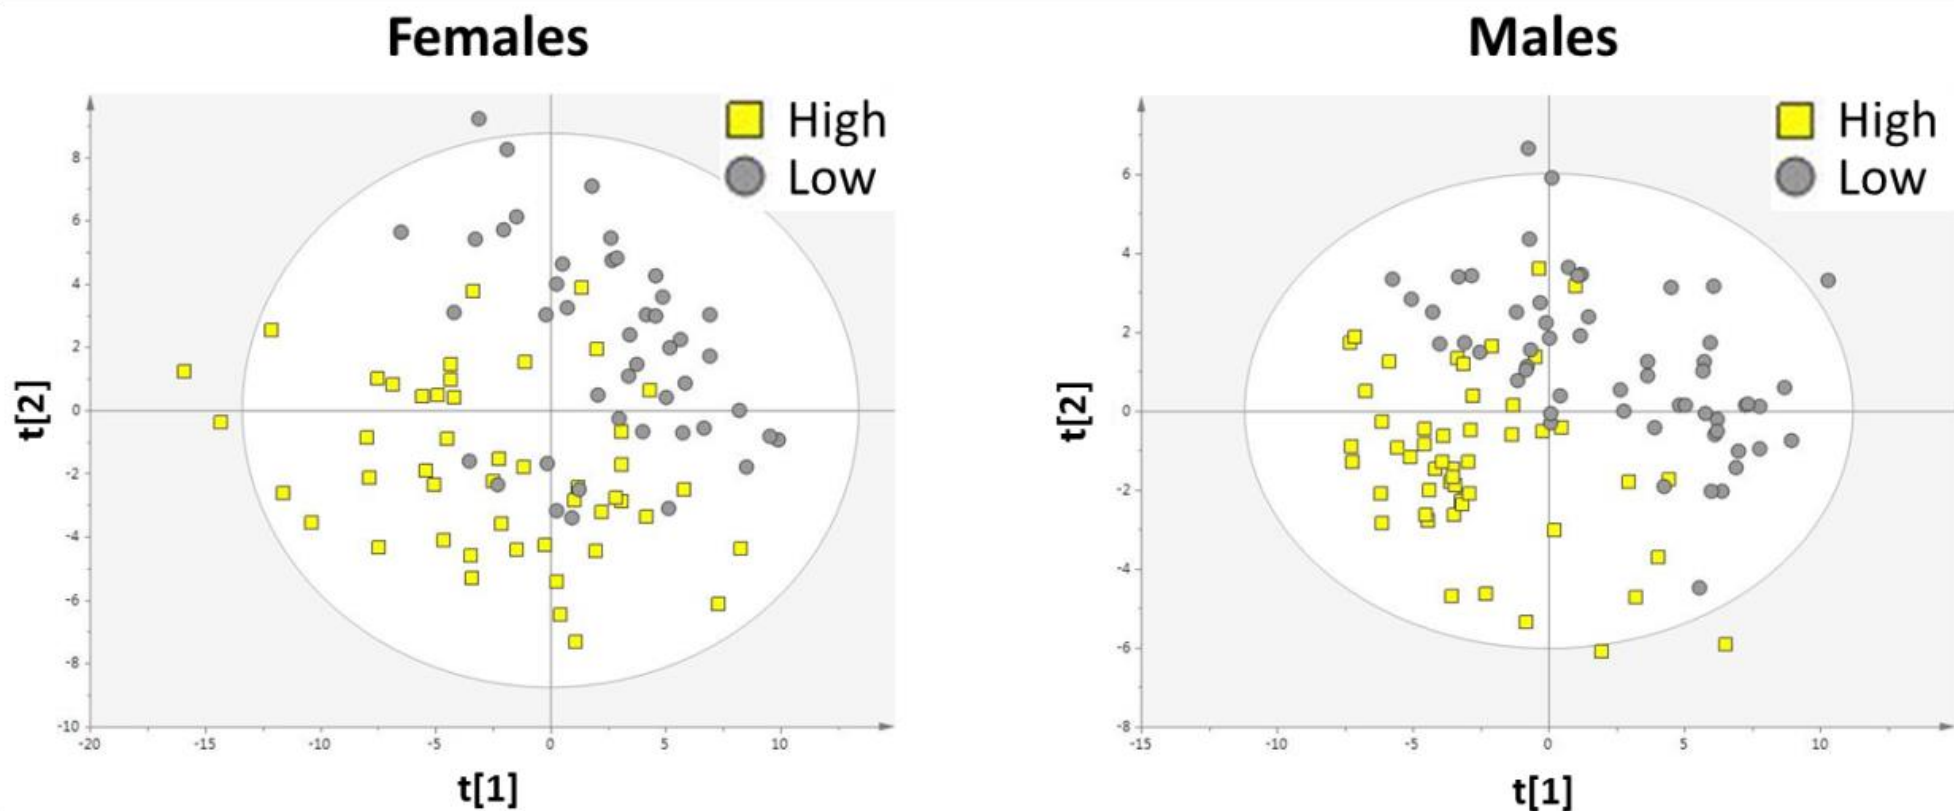

Female ( $R^2X = 0.197$ ,  $R^2Y = 0.539$ ,  $Q^2 = 0.117$ ,  $CV\text{-ANOVA} = 0.038$ ) Male ( $R^2X = 0.204$ ,  $R^2Y = 0.595$ ,  $Q^2 = 0.322$ ,  $CV\text{-ANOVA} = 3.05 \times 10^{-8}$ )

Metabolomics in early life and the association with body composition at age 2 years - Inge van Beijsterveldt, Stuart Snowden, Pernille Neve Myers, Kirsten de Fluiter, Bert van de Heijning, Susanne Brix, Ken Ong, David Dunger, Anita Hokken-Koelega, Albert Koulman - University of Cambridge, UK  
 Tel: +44 (0) 1223 763202, e-mail: [ak675@medschl.cam.ac.uk](mailto:ak675@medschl.cam.ac.uk) / [a.hokken@erasmusmc.nl](mailto:a.hokken@erasmusmc.nl)

**Supplement Table 1. Panel of 15 plasma metabolite variables at 3 months associated with truncal:peripheral fat ratio at 3 months**

| Metabolite variables                                                      | All Individuals |                   |             | Boys    |             | Girls   |             |
|---------------------------------------------------------------------------|-----------------|-------------------|-------------|---------|-------------|---------|-------------|
|                                                                           | p-value         | Corrected p-value | Fold change | p-value | Fold change | p-value | Fold change |
| LysoPS(22:2)                                                              | 0.150           | 0.107             | 1.15        | 0.241   | 1.17        | 0.353   | 1.13        |
| Unknown                                                                   | 0.074           | 0.058             | 1.25        | 0.114   | 1.31        | 0.310   | 1.21        |
| Dimethylarginine                                                          | 0.042           | 0.029             | 1.39        | 0.124   | 1.42        | 0.171   | 1.38        |
| C <sub>24</sub> H <sub>30</sub> O <sub>8</sub>                            | 0.070           | 0.051             | 1.28        | 0.074   | 1.41        | 0.361   | 1.20        |
| C <sup>13</sup> isotope of C <sub>30</sub> H <sub>40</sub> O <sub>8</sub> | 0.026           | 0.014             | 1.20        | 0.009   | 1.33        | 0.542   | 1.07        |
| C <sub>27</sub> H <sub>38</sub> O <sub>9</sub>                            | 0.051           | 0.038             | 1.18        | 0.118   | 1.20        | 0.180   | 1.18        |
| Unknown                                                                   | 0.454           | 0.330             | 1.07        | 0.292   | 1.15        | 0.811   | 1.03        |
| LysoPE(20:1)                                                              | 0.147           | 0.061             | 1.04        | 0.269   | 1.04        | 0.279   | 1.05        |
| Unknown                                                                   | 0.067           | 0.049             | 1.27        | 0.050   | 1.41        | 0.399   | 1.18        |
| LysoPG(16:0)                                                              | 0.034           | 0.041             | 1.12        | 0.041   | 1.15        | 0.270   | 1.10        |
| C <sub>30</sub> H <sub>40</sub> O <sub>8</sub>                            | 0.013           | 0.009             | 1.53        | 0.013   | 1.80        | 0.237   | 1.34        |
| LysoPA(22:1)                                                              | 0.167           | 0.126             | 1.19        | 0.186   | 1.23        | 0.447   | 1.16        |
| Unknown                                                                   | 0.465           | 0.318             | 0.98        | 0.390   | 0.97        | 0.643   | 0.98        |
| Unknown                                                                   | 0.088           | 0.078             | 1.47        | 0.095   | 1.66        | 0.498   | 1.25        |
| Unknown                                                                   | 0.097           | 0.164             | 1.08        | 0.272   | 1.06        | 0.327   | 1.08        |

*'p-value' are the unadjusted p-values. 'Corrected p-values' have been adjusted for sex, birthweight and feeding type. All p-values were calculated using generalized linear models comparing high and low tertiles of trunk:peripheral ratio at 3 months of age. Fold change is calculated relative to the 'low' group. Putative annotations: C<sub>24</sub>H<sub>30</sub>O<sub>8</sub> – Esterone Glucoronide, C<sub>27</sub>H<sub>38</sub>O<sub>9</sub> – Hydroxyprogesterone Glucoronide, C<sub>30</sub>H<sub>40</sub>O<sub>8</sub> – Hydroxypentaoxolanostenoic acid. Abbreviations: LysoPA= lysophosphosphatidic acid, LysoPE= lysophosphatidylethanolamine, LysoPG=lysophosphatidylglycerol, LysoPS= lysophosphatidylserine*

Metabolomics in early life and the association with body composition at age 2 years - Inge van Beijsterveldt, Stuart Snowden, Pernille Neve Myers, Kirsten de Fluiters, Bert van de Heijning, Susanne Brix, Ken Ong, David Dunger, Anita Hokken-Koelega, Albert Koulman - University of Cambridge, UK  
Tel: +44 (0) 1223 763202, e-mail: [ak675@medschl.cam.ac.uk](mailto:ak675@medschl.cam.ac.uk) / [a.hokken@erasmusmc.nl](mailto:a.hokken@erasmusmc.nl)
